# Supplementary material for: Plasmid-mediated metronidazole resistance in Clostridioides difficile
Source: PubMed Central journal article supplement (PMC6992631; doi:10.1038/s41467-020-14382-1), 2020-01-30
Supplement: 41467_2020_14382_MOESM6_ESM.pdf [file 41467_2020_14382_MOESM6_ESM.pdf]

## **Description of Additional Supplementary Files**

File name: Supplementary Data 1

Description: Strains characterized with agar dilution and tested for presence of pCD-METRO

File name: Supplementary Data 2

Description: Assembly of the MTZ<sup>R</sup> RT020 strain IB136
